# Supplementary material for: Alkylthiol-enabled Se powder dissolving for phosphine-free synthesis of highly emissive, large-sized and spherical Mn-doped ZnSeS nanocrystals
Source: Royal Society of Chemistry journal article supplement (doi:10.1039/c7ra06873e), 2017-01-01
Supplement: c7ra06873e1.pdf [file c7ra06873e1.pdf]

## Electronic Supplementary Information

### **Alkylthiol-Enabled Se Powder Dissolving for Phosphine-Free Synthesis of Highly Emissive, Large-sized and Spheric Mn-Doped ZnSeS Nanocrystals**

Bao Ke,<sup>a,#</sup> Xianwei Bai,<sup>b,#</sup> Rongkai Wang,<sup>c</sup> Yayun Shen,<sup>c</sup> Chunxiao Cai,<sup>a</sup> Kun Bai,<sup>a</sup> Ruosheng Zeng,<sup>\*,a</sup>

Bingsuo Zou,<sup>b</sup> Zhencheng Chen<sup>\*,a</sup>

<sup>a</sup>School of Material Science and Engineering, School of Life and Environmental Sciences, Guilin University of Electronic Technology, Guilin 541004, P. R. China

<sup>b</sup>School of Materials Science & Engineering, Beijing Institute of Technology, Beijing 100081, P. R. China

<sup>c</sup>School of Chemistry and Materials Science, Guizhou Normal University, Guiyang 550001, P. R. China

<sup>d</sup>Department of Experiential Practice, Guilin University of Electronic Technology, Guilin 541004, P. R. China

\*Corresponding authors: zengrsh@guet.edu.cn (R. Zeng), chenzhcheng@guet.edu.cn (Z. Chen)

#These authors contributed equally to the paper.

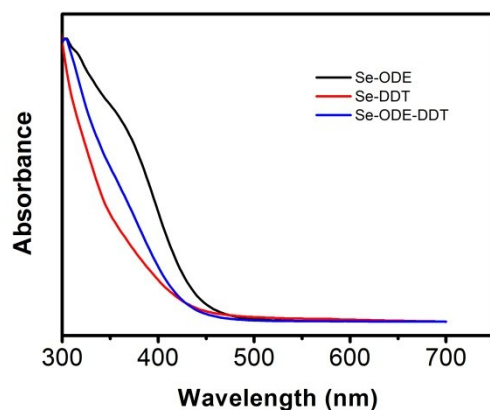

Figure 1S. UV-vis absorption spectra of Se powder dissolving in the different organics.

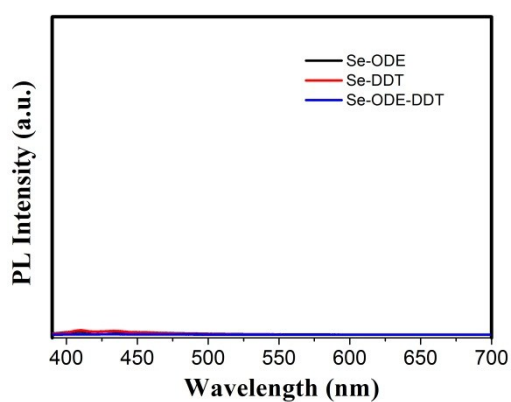

Figure 2S. PL spectra of Se powder dissolving in the different organics.

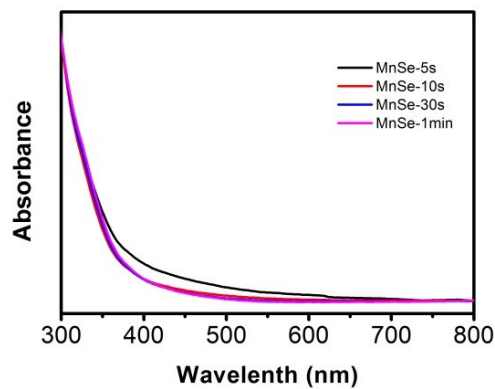

Figure 3S. UV-vis absorption spectra of MnSe cores at the different growth time.

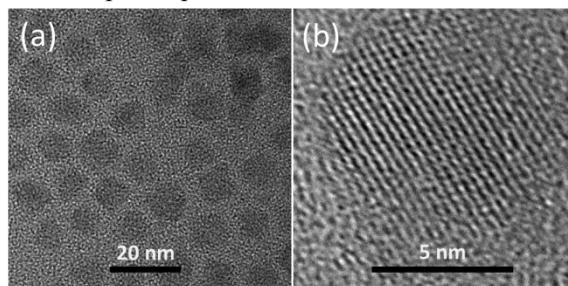

Figure S4. TEM and HRTEM images of Mn:ZnSeS QDs.
